# Supplementary material
Source: PubMed Central journal article supplement (PMC9998367)
Supplement: NIHMS1872754-supplement-1.pdf [file NIHMS1872754-supplement-1.pdf]

**A**

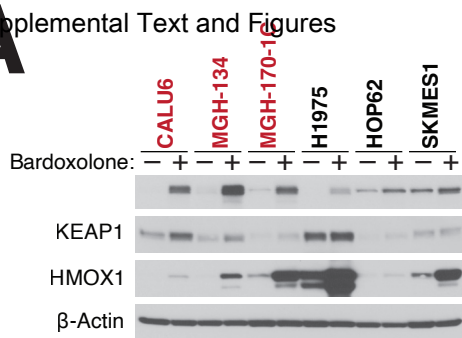

**B**

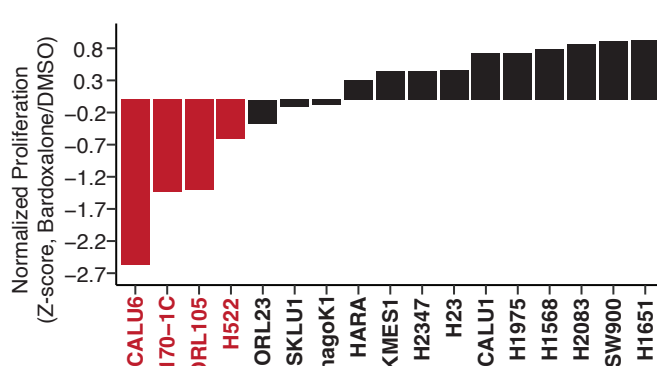

**C**

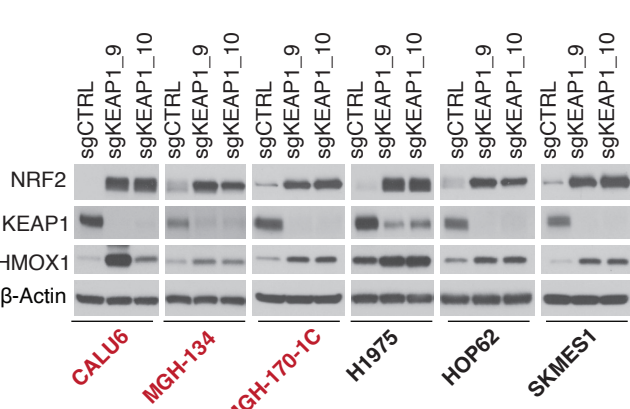

**D**

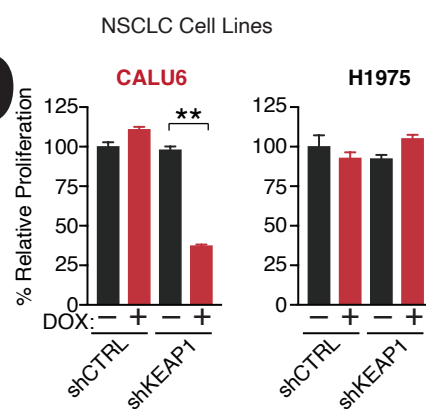

**E**

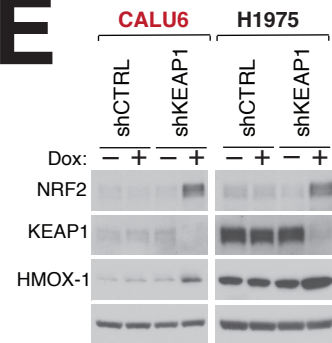

**F**

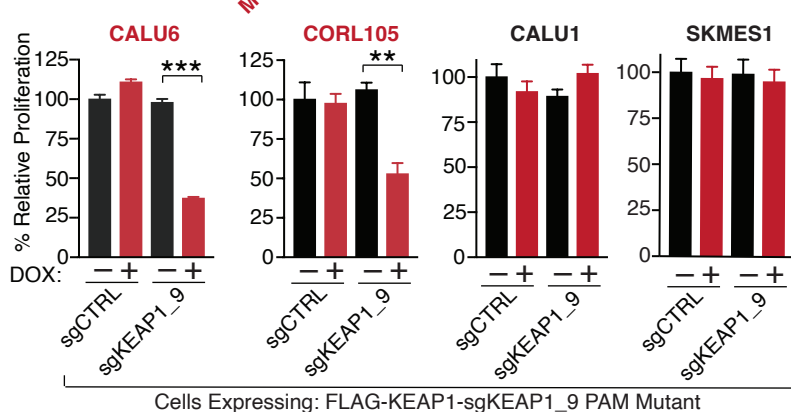

**G**

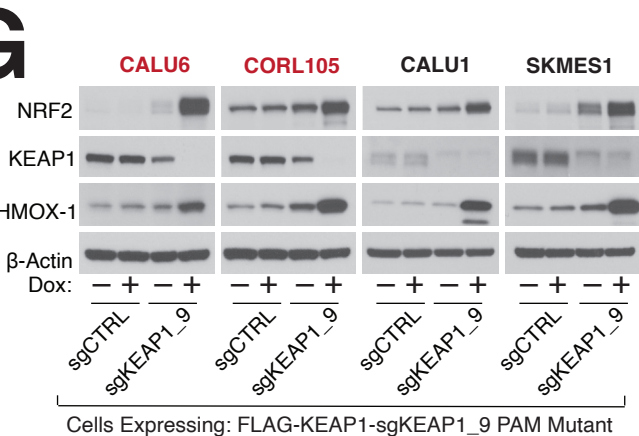

**H**

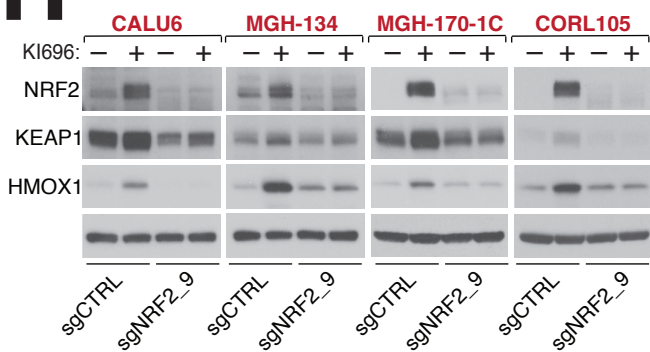

**I**

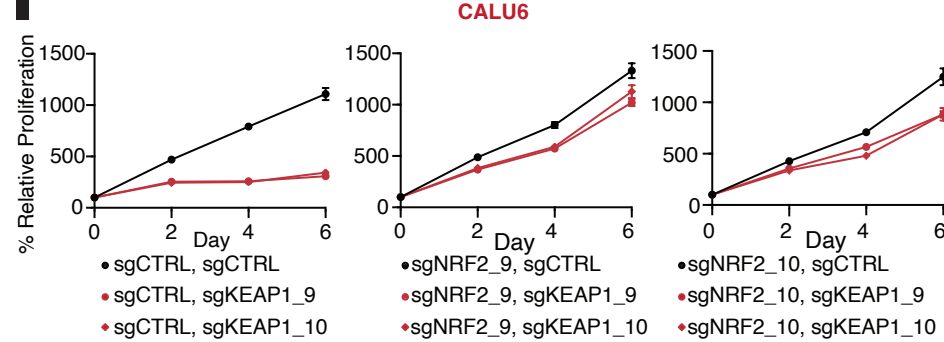

**J**

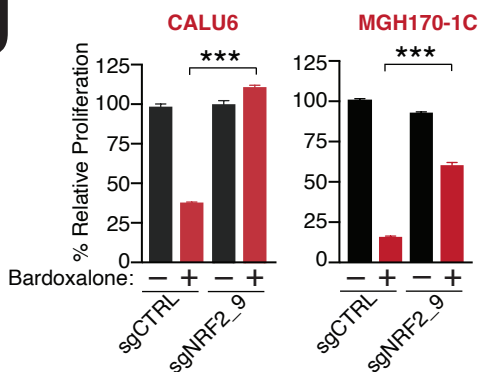

**K**

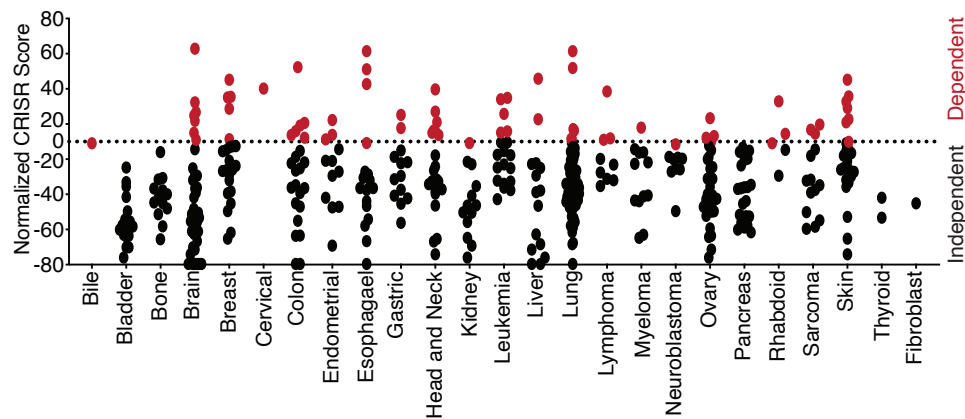

**Figure S1: Identification of KEAP1-dependent NSCLC cell lines, Related to Figure 1. (A)**

Bardoxolone treatment activates NRF2. Representative immunoblot analysis of NSCLC cell lines treated with bardoxolone (100 nM) for 48 hrs. (B) Bardoxolone blocks the proliferation of KEAP1-dependent cells. NSCLC cells were treated with bardoxolone (100 nM) and proliferation was determined by crystal violet staining 6 days post-treatment. (C) Representative immunoblot analysis of NSCLC cell lines expressing the indicated sgRNAs targeting KEAP1. (D) shRNA-mediated depletion of KEAP1 blocks the proliferation of *KEAP1*-mutant cells. CALU6 and H1975 were infected with a doxycycline (DOX)-inducible shRNA targeting KEAP1 or a control. Cells were pre-treated with DOX (100 nM) for 72 hrs and cell proliferation was determined as described in (B) (Data are represented as a mean  $\pm$  SEM, n= 3-5 biological replicates). (E) Representative immunoblot analysis of DOX-inducible depletion of KEAP1. (F-G) Addback of sgRNA resistant KEAP1 cDNA rescues KEAP1 depletion. NSCLC cell lines stably co-expressing a DOX-repressible FLAG-KEAP1-PAM mutant cDNA and sgRNAs targeting KEAP1 were treated with DOX (100 nM) for 72 hrs and cell proliferation (F) was determined as described in (B) and levels of the indicated proteins were determined by immunoblot (G) (Data for proliferation assay are represented as a mean  $\pm$  SEM, n= 3-5 biological replicates). (H) Representative immunoblot analysis of NSCLC cell lines expressing the indicated sgRNAs targeting NRF2 following treatment with KI696 (1  $\mu$ M). (I) Depletion of NRF2 rescues the proliferation of CALU6 cells following loss of KEAP1. The proliferation of CALU6 cells co-expressing sgRNAs targeting NRF2 or KEAP1 was assessed by measuring relative concentrations of ATP (Data are represented as a mean  $\pm$  SEM, n=6 biological replicates). (J) NRF2-depletion rescues bardoxolone sensitivity in KEAP1-dependent cell lines. NSCLC cells expressing the indicated sgRNA targeting NRF2 or a control were treated with Bardoxolone and proliferation was determined as described in (B) (Data are represented as a mean  $\pm$  SEM, n= 5 biological replicates). (K) KEAP1 is a dependency in multiple cancer subtypes as indicated in red. Cancer dependency (DEPMAP<sup>1</sup>) data was analyzed as described in <sup>2</sup>. \* indicates *p*-values < 0.05, \*\* indicates *p*-values < 0.01, \*\*\* indicates *p*-values <

0.0001. One-way ANOVA with Sidak's post-hoc analyses used to determine statistical significance.

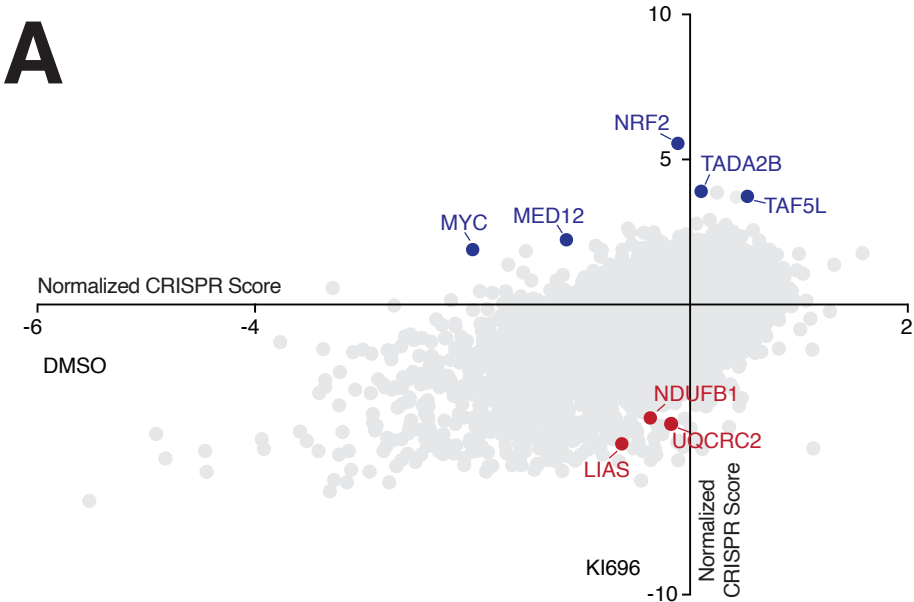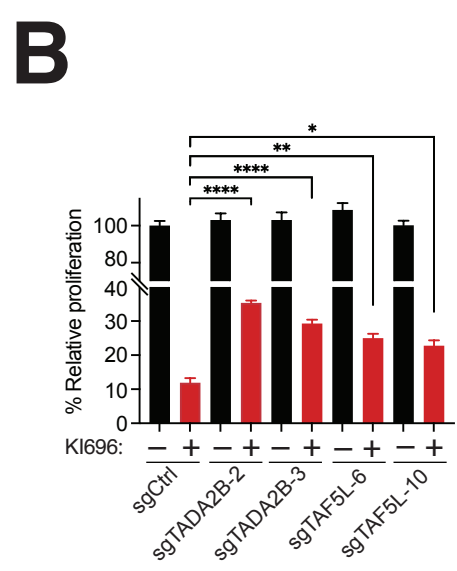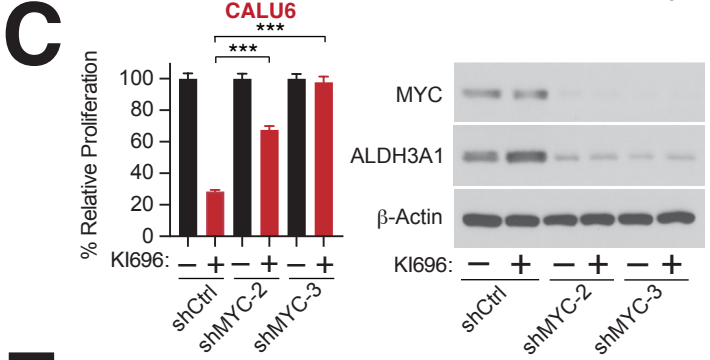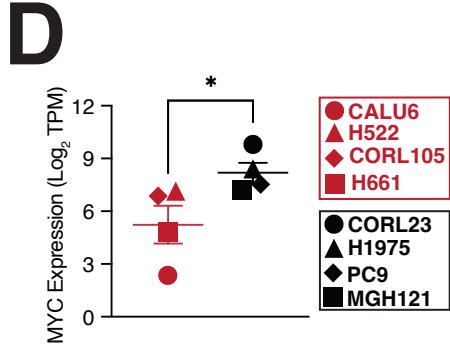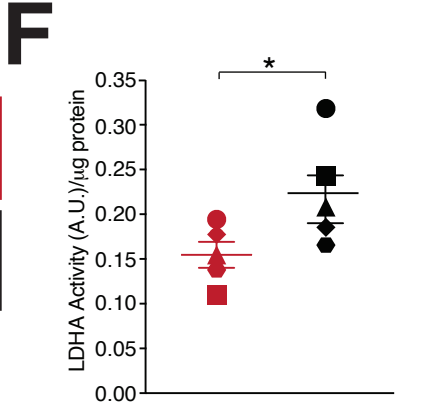

### E

#### Metabolic CRISPR Screen

| Pathway                 | CALU6 CRISPR Score ( $\text{Log}_2$ ) | H1975 CRISPR Score ( $\text{Log}_2$ ) | CALU6/H1975 Fold Change ( $\text{Log}_2$ ) | p-value |
|-------------------------|---------------------------------------|---------------------------------------|--------------------------------------------|---------|
| OXPHOS                  | -0.6451                               | 0.3275                                | <b>0.9726</b>                              | ****    |
| Sphingolipid Metabolism | 0.0660                                | 0.0759                                | 0.0099                                     | NS      |
| Phospholipid Metabolism | -0.7244                               | -0.5534                               | 0.1710                                     | NS      |
| Amino acid Metabolism   | -0.1115                               | -0.0369                               | 0.0746                                     | NS      |
| Fatty acid Metabolism   | 0.0310                                | -0.0100                               | -0.0410                                    | NS      |
| Cholesterol Metabolism  | -0.1108                               | -0.0207                               | 0.1315                                     | NS      |
| Bile acid Metabolism    | -0.0022                               | 0.0531                                | 0.0552                                     | NS      |
| Vitamin Metabolism      | 0.0059                                | 0.0759                                | 0.0700                                     | NS      |
| Glycolysis              | 0.5637                                | -0.305                                | <b>-0.8687</b>                             | ****    |

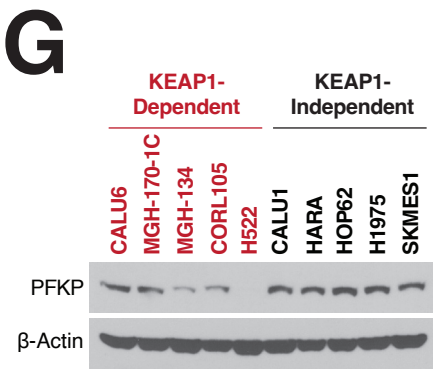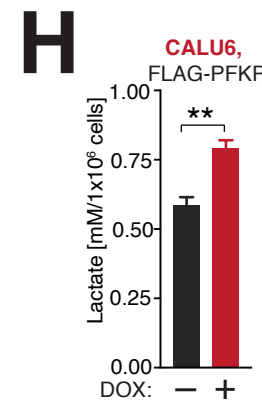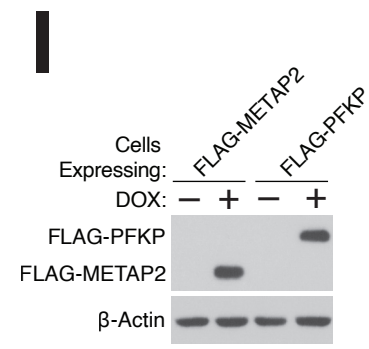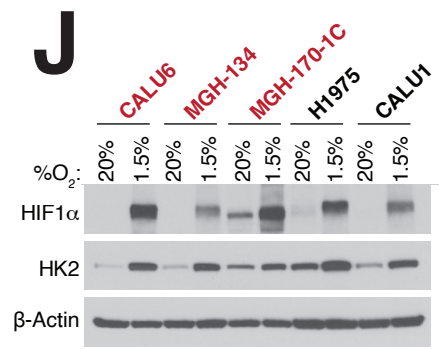

**Figure S2: KEAP1-independent cells are marked by high glycolytic rates, Related to Figure**

1. (A) Scatter plot of genome-wide CRISPR scores for individual genes in CALU6 cells treated with vehicle or KI696. Genes marked in red mediate sensitivity whereas genes marked in blue mediate resistance (see also **Figure 1E**). (B) Depletion of mediator components partially rescues proliferation following NRF2 activation. CALU6 cells expressing the indicated sgRNAs were treated with KI696 (1  $\mu$ M) and proliferation was determined by crystal violet staining 6 days post treatment (Data are represented as a mean  $\pm$  SEM, n= 30 biological replicates). (C) shRNA-mediated depletion of MYC rescues the proliferation of KEAP1-dependent cells following KI696 treatment. Right, CALU6 cells expressing the indicated shRNAs were treated with KI696 and proliferation was determined as described in (B). Left, immunoblot analysis of the indicated proteins in CALU6 cells expressing shRNAs targeting MYC and treated with KI696. (D) MYC has lower expression in KEAP1-dependent cells (data obtained from CBio Portal). (E) Table summarizing CRISPR scores for the indicated metabolic pathways in CALU6 and H1975 cells (see also **Figure 1H**). (F) KEAP1-dependent cells have lower lactate dehydrogenase (LDH) activity in comparison to KEAP1-independent cells. LDH activity was determined for each cell line as described in the methods (Data are represented as a mean  $\pm$  SEM, n= 5 samples per group with 16 measurements per sample). (G) PFKP is differentially expressed in KEAP1-independent cell lines. Representative immunoblot analysis of the indicated proteins in KEAP1-dependent and KEAP1-independent NSCLC cell lines (see also **Figure 2C**). (H) Over-expression of PFKP increases lactate levels in CALU6 cells. CALU6 cells stably expressing DOX-inducible FLAG-PFKP were treated with DOX (100 nM) for 3 days and lactate levels were measured as described in the methods (Data are represented as a mean  $\pm$  SEM, n= 3 biological replicates). (I) Immunoblot analysis of FLAG-PFKP or FLAG-METAP2 expression in CALU6 cells following DOX treatment (100 nM). (J) Induction of hypoxia in NSCLC cell lines. NSCLC cell lines were grown at the indicated oxygen concentrations for 3 days and the expression of the indicated proteins was

determined by immunoblot. \* indicates  $p$ -values  $< 0.05$ , \*\* indicates  $p$ -values  $< 0.01$ , \*\*\* indicates  $p$ -values  $< 0.0001$ . Statistical significance was determined by Student's  $t$ -test.



**Figure S3: KEAP1-dependent cells are sensitive to Complex I inhibition, Related to Figure**

**3.** (A) NRF2 regulates TCA metabolism in KEAP1-dependent cells. CALU6 cells expressing the indicated sgRNA targeting NRF2 or a non-targeting control, were treated with KI696 and the levels of m/z-values corresponding to the indicated metabolites were determined by LCMS (see methods). Fold change (KI696/DMSO) is depicted in the plots (Data are represented as a mean  $\pm$  SEM, n=3 biological replicates). (B-C) NRF2 activation does not change the expression of mitochondrial genes involved in ETC or TCA cycle. CALU6 cells were treated with KI696 (1  $\mu$ M) for 48 hrs and changes in gene expression (B) were determined by RNAseq or protein expression (C) were determined by proteomics and depicted in the corresponding heatmaps (see methods and **Data S1**). (D) Proliferation of NSCLC cell lines following treatment with the indicated ETC inhibitors following 6 days of treatment were determined by crystal violet staining (Data are represented as a mean  $\pm$  SEM, n= 6 biological replicates). (E) Complex I inhibitors selectively block KEAP1-dependent cell lines. IC<sub>50</sub>-values were determined for a panel of NSCLC cell lines (Data are represented as a mean  $\pm$  SEM, n= 4 samples per group and 6 biological replicates). (F) Uridine supplementation selectively sensitizes KEAP1-dependent cells to Complex III-V inhibition. IC<sub>50</sub>-values were determined for a panel of KEAP1-dependent and KEAP1-independent NSCLC cell lines grown in media containing uridine. Proliferation was determined as described in (D) (Data are represented as a mean  $\pm$  SEM, n= 4 samples per group and 6 biological replicates\* indicates *p*-values < 0.05, \*\* indicates *p*-values < 0.01, \*\*\* indicates *p*-values < 0.0001. Statistical significance was determined by Student's t-test.



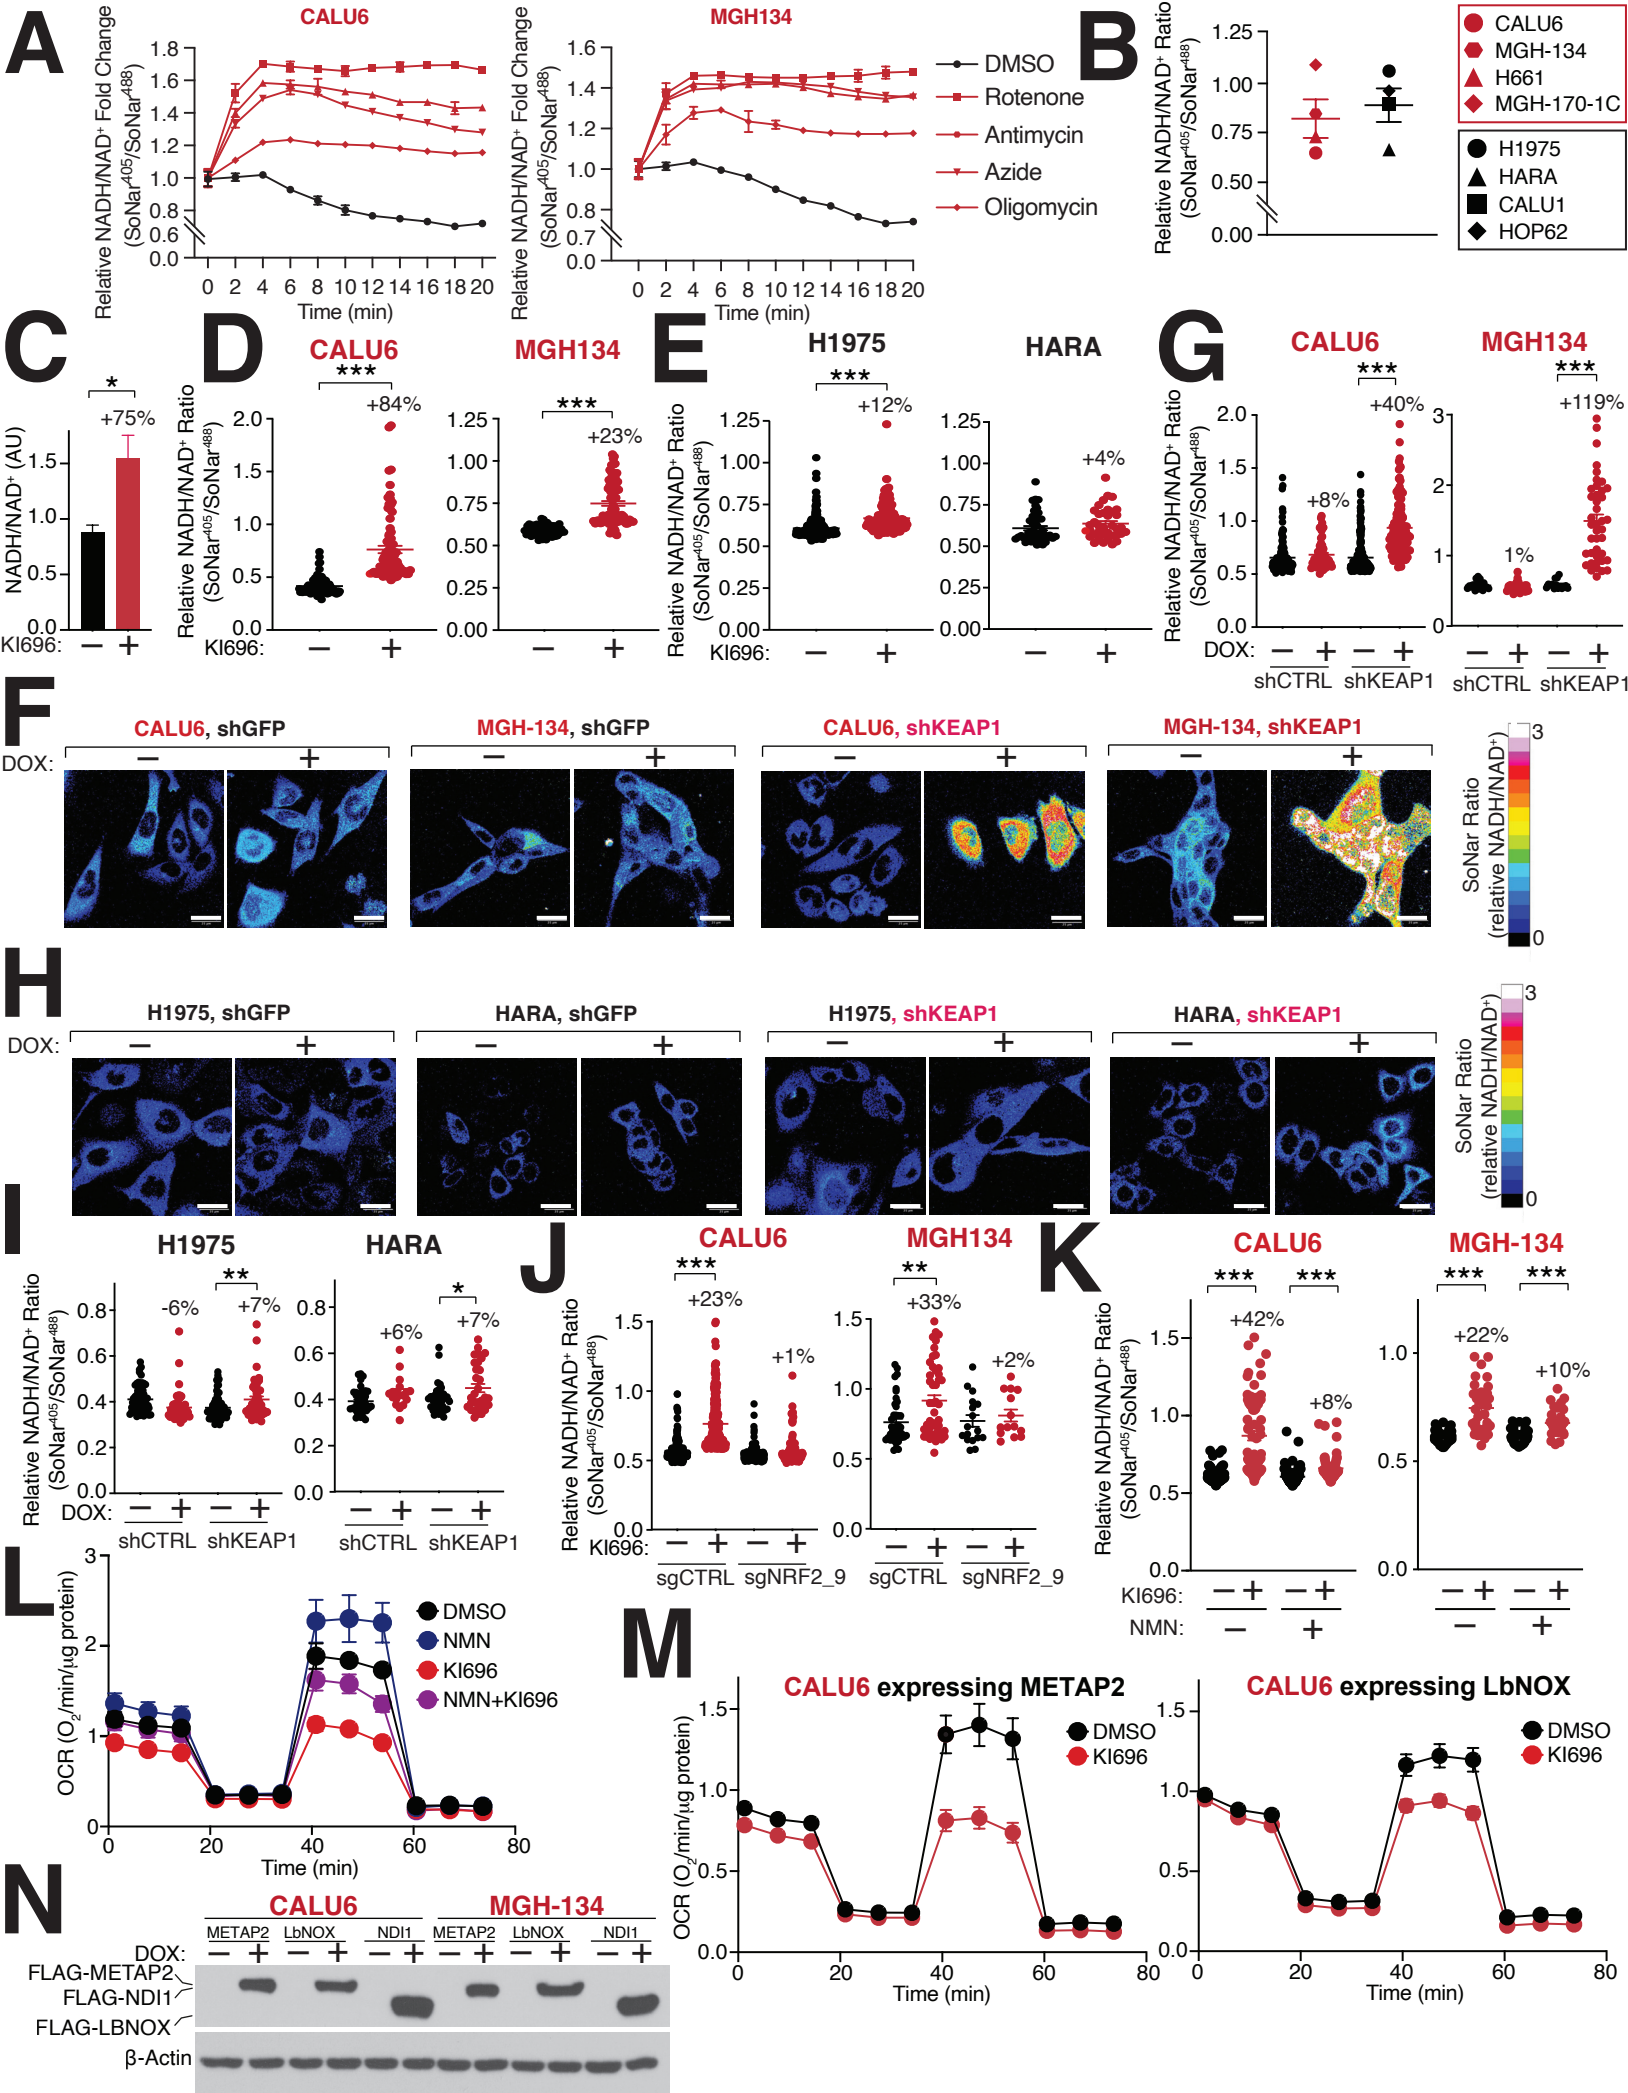

**Figure S4: NRF2 regulates the NADH/NAD<sup>+</sup> ratio in KEAP1-dependent cells, Related to Figure 4.** (A) ETC inhibition increases NADH/NAD<sup>+</sup> ratio. CALU6 and MGH134 cells expressing SoNar were treated with the indicated inhibitors and the NADH/NAD<sup>+</sup> ratio was determined by flow cytometry with the ratio of the emission intensity at  $\lambda_{em}$  530nm after excitation  $\lambda_{ex}$  at 405 nm (NADH binding) compared to excitation  $\lambda_{ex}$  at 488 nm (NAD<sup>+</sup> binding). (B) KEAP1-dependent and KEAP1-independent cells have a similar NADH/NAD<sup>+</sup> ratio at basal states. The NADH/NAD<sup>+</sup> ratio in NSCLC cell lines stably expressing SoNar was determined as described in (A) (Data are represented as a mean  $\pm$  SEM, n= 4 samples per group). (C) NRF2 activation increases the NADH/NAD<sup>+</sup> ratio in CALU6 cells. CALU6 was treated for 2 days with KI696 (1  $\mu$ M) and the NADH/NAD<sup>+</sup> ratio was determined using a coupled enzymatic method as described in **Methods** (Data are represented as a mean  $\pm$  SEM, n= 3 biological replicates). (D) Quantification of NADH/NAD<sup>+</sup> ratio following NRF2 activation in KEAP1-dependent cells. NSCLC cell lines expressing SONAR were treated for 2 days with KI696 and the NADH/NAD<sup>+</sup> ratio was determined by immunofluorescence analysis comparing the emission intensity after excitation at  $\lambda_{ex}$  405 nm to  $\lambda_{ex}$  488nm (Data are represented as a mean  $\pm$  SEM, n=138 cells for MGH-134 and n=162 cells for CALU6 were analyzed from 2 biological replicates) (see also **Figure 4A**). (E) Quantification of NADH/NAD<sup>+</sup> ratio following NRF2 activation in KEAP1-independent cells. Cells stably expressing SONAR were treated and analyzed as described in (D) (Data are represented as a mean  $\pm$  SEM, n=156 cells for H1975 and n=138 cells for HARA were analyzed from 2 biological replicates) (see also **Figure 4A**). (F-G) Depletion of KEAP1 in CALU6 or MGH-134 increases NADH/NAD<sup>+</sup> ratio. NSCLC cell lines stably expressing SoNar and a DOX-inducible shRNA targeting KEAP1 or a non-targeting control were treated with DOX (100 nM) for 3 days and the NADH/NAD<sup>+</sup> ratio was quantified (G) as in (D) (Data are represented as a mean  $\pm$  SEM, n=232 cells for CALU6 and n=160 cells for MGH-134 from 2 biological replicates). (H-I) Depletion of KEAP1 in H1975 or HARA only moderately increases the NADH/NAD<sup>+</sup> ratio. NSCLC cells stably co-expressing SoNar and indicated DOX-inducible shRNAs (H) were treated and analyzed (G) for changes in

NADH/NAD<sup>+</sup> ratio as described in (F-G) (Data are represented as a mean  $\pm$  SEM, n=204 cells for H1975 and n=156 cells for HARA were analyzed from 2 biological replicates). (J) NRF2 regulates the NADH/NAD<sup>+</sup> ratio in KEAP1-dependent cells. Quantification of NADH/NAD<sup>+</sup> in NSCLC cell lines expressing the indicated sgRNAs and treated with KI696 (1  $\mu$ M) for 2 days (Data are represented as a mean  $\pm$  SEM, n=284 cells for CALU6 and n=184 cells for MGH-134 were analyzed from 2-3 biological replicates) (see also **Figure 4B**). (K) NMN treatment decreases the NADH/NAD<sup>+</sup> ratio following NRF2 activation. NSCLC cell lines expressing SoNar were co-treated with NMN (1 mM) and KI696 (1  $\mu$ M) for 2 days and the NADH/NAD<sup>+</sup> ratio was determined as described in (A) (Data are represented as a mean  $\pm$  SEM, n=213 cells for CALU6 and n=198 cells for MGH-134 were analyzed from 2 biological replicates) (**see also Figure 4C**). (L) NMN treatment rescues NRF2-mediated blockage of respiration. CALU6 cells were co-treated with NMN (1 mM), KI696 (1  $\mu$ M) for 2 days or vehicle controls and OCR was determined by Seahorse Bioflux Analyzer (Data are represented as a mean  $\pm$  SEM, n=6-8 biological replicates). (M) Over-expression of LBNOX overcomes NRF2-mediated blockage in OCR. CALU6 cells stably expressing DOX-inducible LbNOX or METAP2 (control) were pre-treated with DOX (100 nM) for 2 days followed by KI696 (1  $\mu$ M) for another 2 days and OCR was determined as described in (L) (Data are represented as a mean  $\pm$  SEM, n=6-8 biological replicates). (N) Representative immunoblot analysis of CALU6 and MGH-134 cells stably expressing DOX-inducible LbNOX, NDI1 or METAP2 following DOX treatment for 2 days. \* indicates  $p$ -values < 0.05, \*\* indicates  $p$ -values < 0.01, \*\*\* indicates  $p$ -values < 0.0001. Statistical significance was determined by Student's t-test or one-way ANOVA with Sidak's correction for multiple hypotheses for (G-J). Scale bar: 25  $\mu$ m.

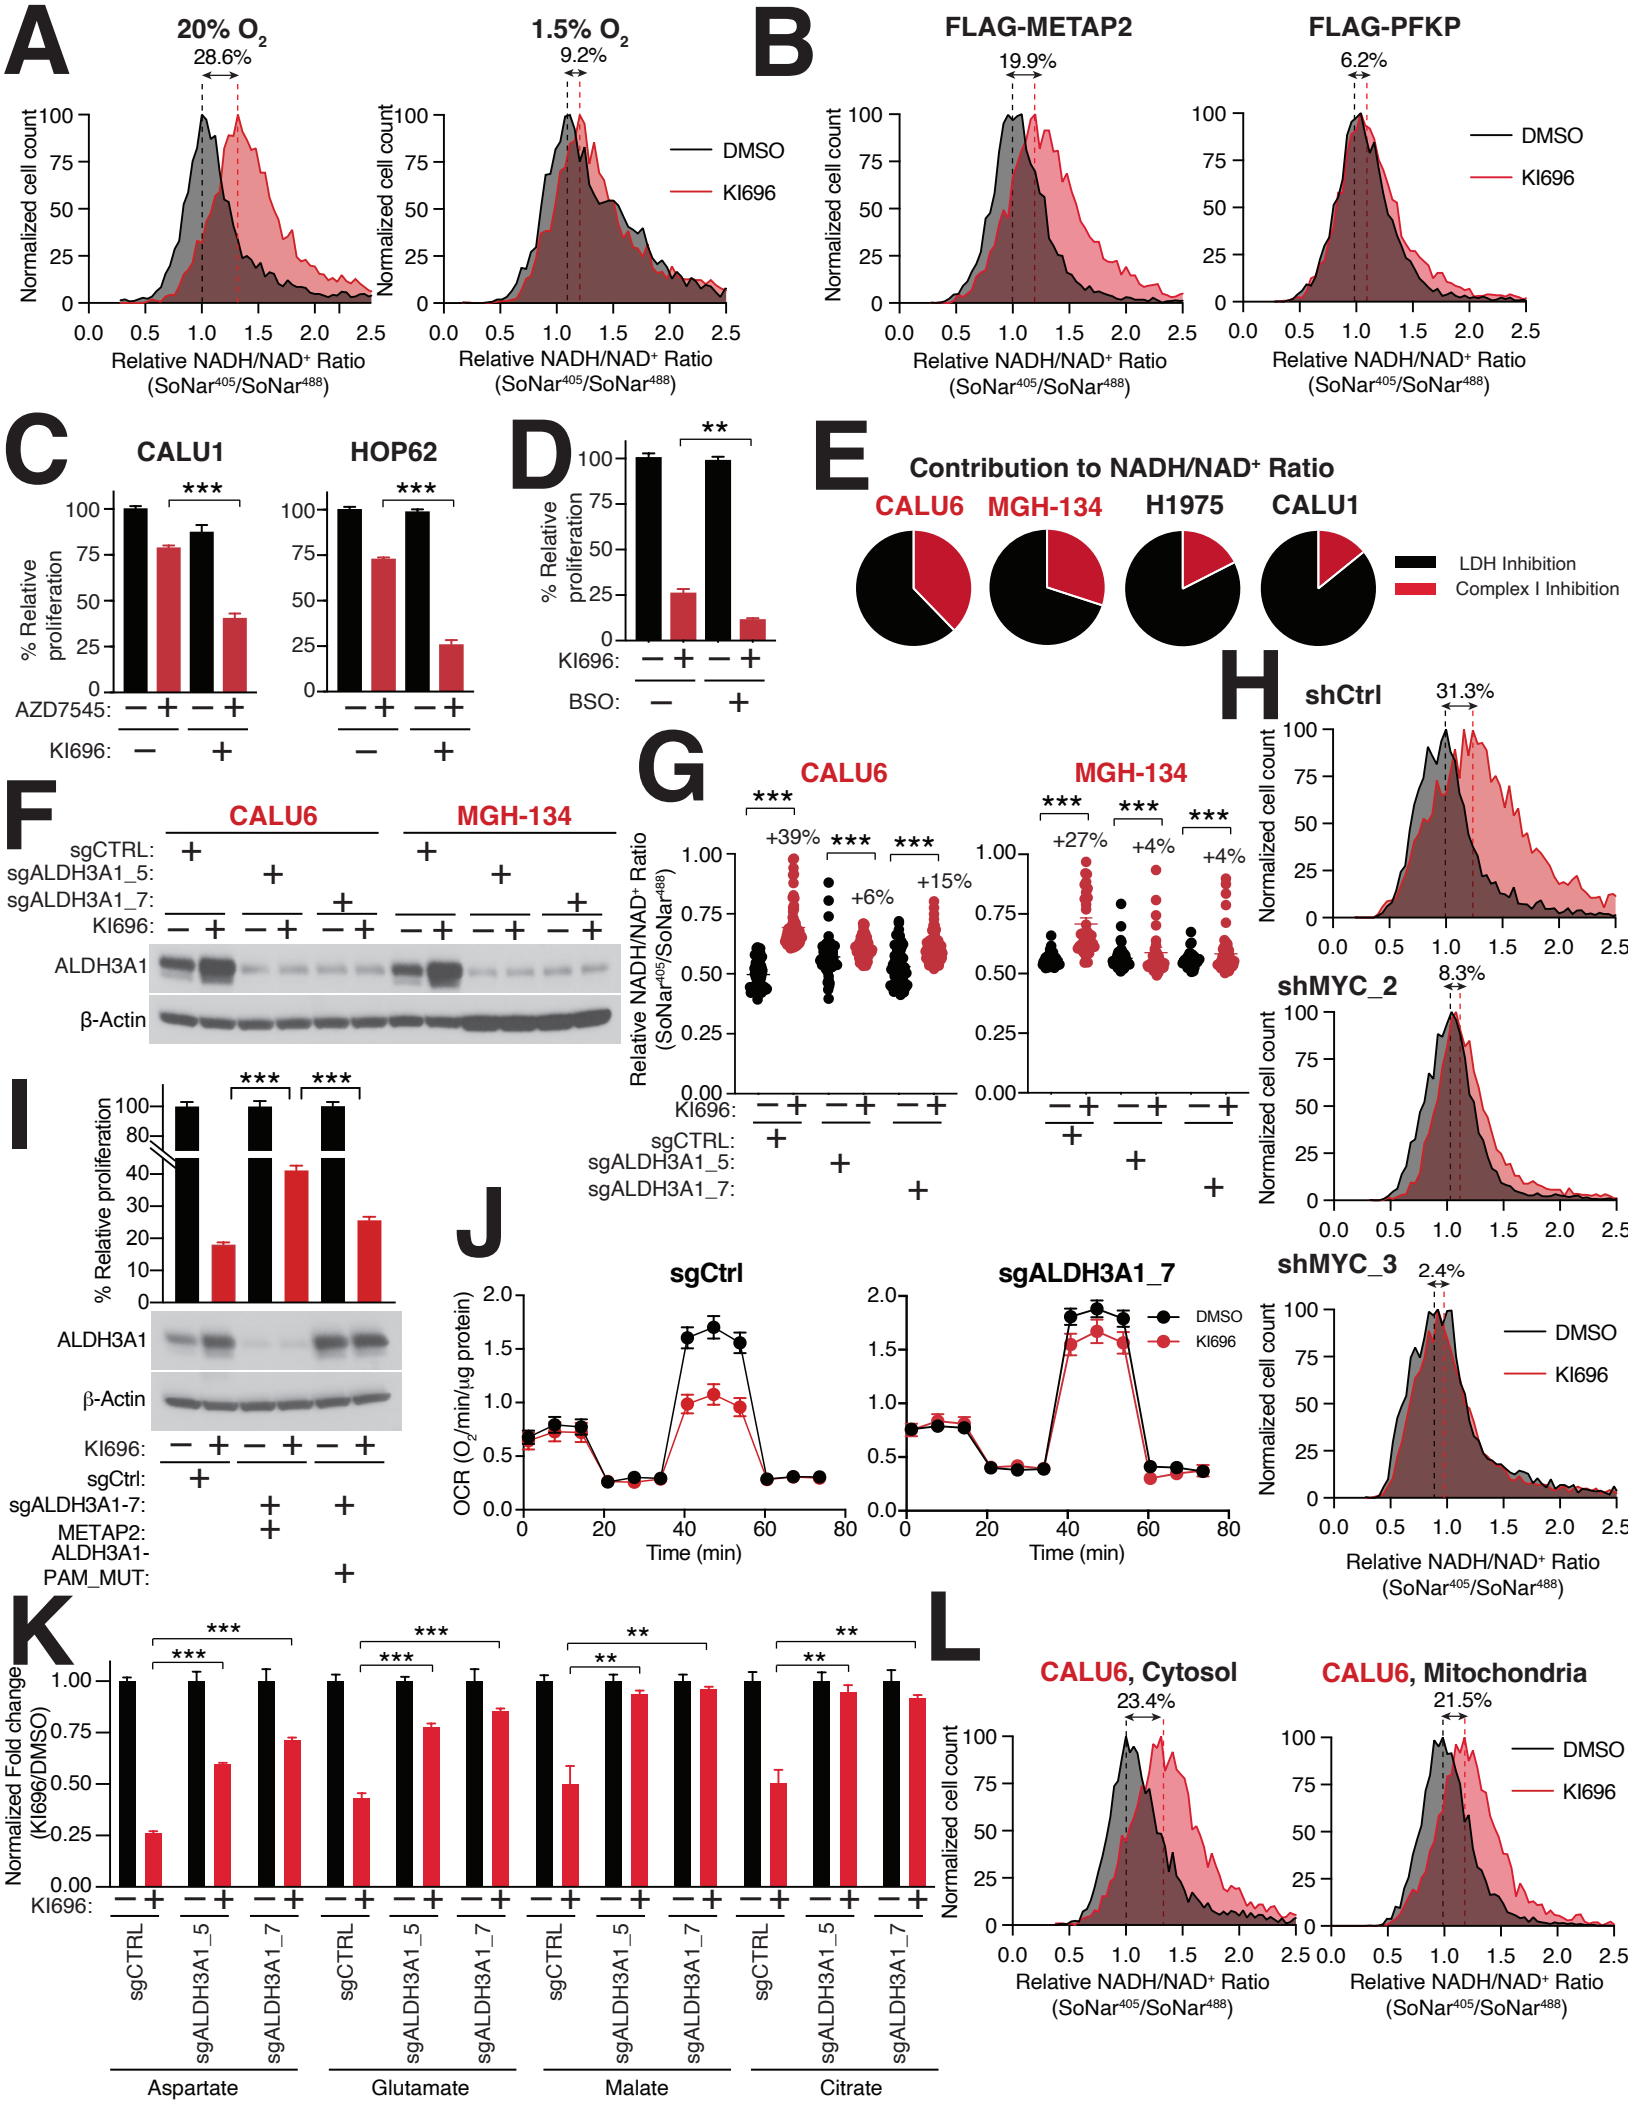

**Figure S5: ALDH3A1 is a key regulator of the NADH/NAD<sup>+</sup> ratio following NRF2 activation, Related to Figure 5.** (A) Hypoxia decreases NADH/NAD magnitude change upon NRF2 activation. CALU6 cells expressing SoNar were grown under normoxic or hypoxic conditions for 3 days, prior to 48 hr treatment with KI696 (1  $\mu$ M). NADH/NAD ratio was determined by flow cytometry analysis comparing the emission intensity after excitation at 405 nm and 488 nm. (B) Over-expression of PFKFB3 stymies NRF2-mediated NADH increase. CALU6 cells stably expressing SoNar and DOX-inducible FLAG-PFKFB3 or FLAG-METPA2 (control) were treated with DOX (100  $\mu$ M) for 48 hrs and then KI696 (1  $\mu$ M) for an additional 48 hrs. NADH/NAD ratio was determined by flow cytometry as described in (A). (C) Inhibition of pyruvate dehydrogenase kinase (PDK) sensitizes KEAP1-independent cells to NRF2 activation. NSCLC cell lines were co-treated with AZD7545 (PDK inhibitor, 100  $\mu$ M) and KI696 (1  $\mu$ M) for 6 days. Cell proliferation was determined by crystal violet staining (Data are represented as a mean  $\pm$  SEM, n= 5 biological replicates). (D) Inhibition of glutathione synthesis does not rescue NRF2 activation in KEAP1-dependent cell lines. CALU6 cells were co-treated with BSO (50  $\mu$ M) or KI696 (1  $\mu$ M) and proliferation was determined as described in (C) (Data are represented as a mean  $\pm$  SEM, n= 5 biological replicates). (E) KEAP1-dependent cells have a greater reliance on Complex I for NADH oxidation. NSCLC cell lines expressing SoNar were treated with rotenone (Complex I inhibitor, 0.5  $\mu$ M) followed by treatment with oxamate (LDHA inhibitor, 5 mM) and the change in NADH/NAD<sup>+</sup> ratio was as described in (A). NADH/NAD<sup>+</sup> ratio was normalized to the max ratio observed following treatment with both inhibitors (Data are represented as a mean  $\pm$  SEM, n= 2 samples per group representative of two biological replicates). (F) Representative immunoblot of ALDH3A1 in CALU6 and MGH-134 cells expressing sgRNAs targeting ALDH3A1. (G) Depletion of ALDH3A1 in KEAP1-dependent cells reverts NRF2 mediated increase in NADH/NAD<sup>+</sup> levels. NSCLC cell lines co-expressing SoNar and the indicated sgRNAs were treated with and KI696 for 2 days and the NADH/NAD<sup>+</sup> ratio was determined by immunofluorescence analysis comparing the emission intensity after excitation with 405 nm and 488 nm (Data are represented as a mean

± SEM, n=429 cells for CALU6 and n=286 cells for MGH-134 were analyzed from 4 biological replicates) (see also **Figure 5B**). (H) Depletion of MYC reverts NADH/NAD<sup>+</sup> following NRF2 activation. CALU6 cells co-expressing SoNar and the indicated shRNAs were treated with KI696 (1 μM) for 48 hrs and the NADH/NAD<sup>+</sup> ratio was determined by flow cytometry as described in (A). (I) Expression of a PAM-mutant ALDH3A1 restores KI696-sensitivity in KEAP1-dependent cells. CALU6 cells co-expressing ALDH3A1 PAM-mutant or control protein (METAP2) along with sgRNA targeting ALDH3A1 were treated with KI696 (1 μM) and proliferation was determined as in (C). (J) ALDH3A1 depletion partially rescues NRF2-mediated defects in respiration. CALU6 cells expressing the indicated sgRNAs were treated with KI696 (1 μM) for 48 hrs and respiration was determined by Seahorse Bioflux Analyzer (Data are represented as a mean ± SEM, n=8 biological replicates). (K) Reducing ALDH3A1 levels restores TCA metabolites after NRF2-activation. CALU6 cells expressing the indicated sgRNAs were treated with KI696 (1 μM) for 48 hrs and the levels of the indicated metabolites were determined by GCMS (see methods). Fold change (KI696/DMSO) is depicted in the plots (Data are represented as a mean, n= 3 biological replicates per sample). (L) Activating NRF2 increases NADH/NAD<sup>+</sup> ratio in the cytosol and mitochondrial matrix. CALU6 and MGH134 cells expressing cytosolic and mitochondrial matrix SoNar were treated for 48 hrs with KI696 (1 μM) and the change in NADH/NAD<sup>+</sup> ratio was determined as described in (A). \* indicates *p*-values < 0.05, \*\* indicates *p*-values < 0.01, \*\*\* indicates *p*-values < 0.0001. Statistical significance was determined by one-way ANOVA with Sidak's post-hoc correction.

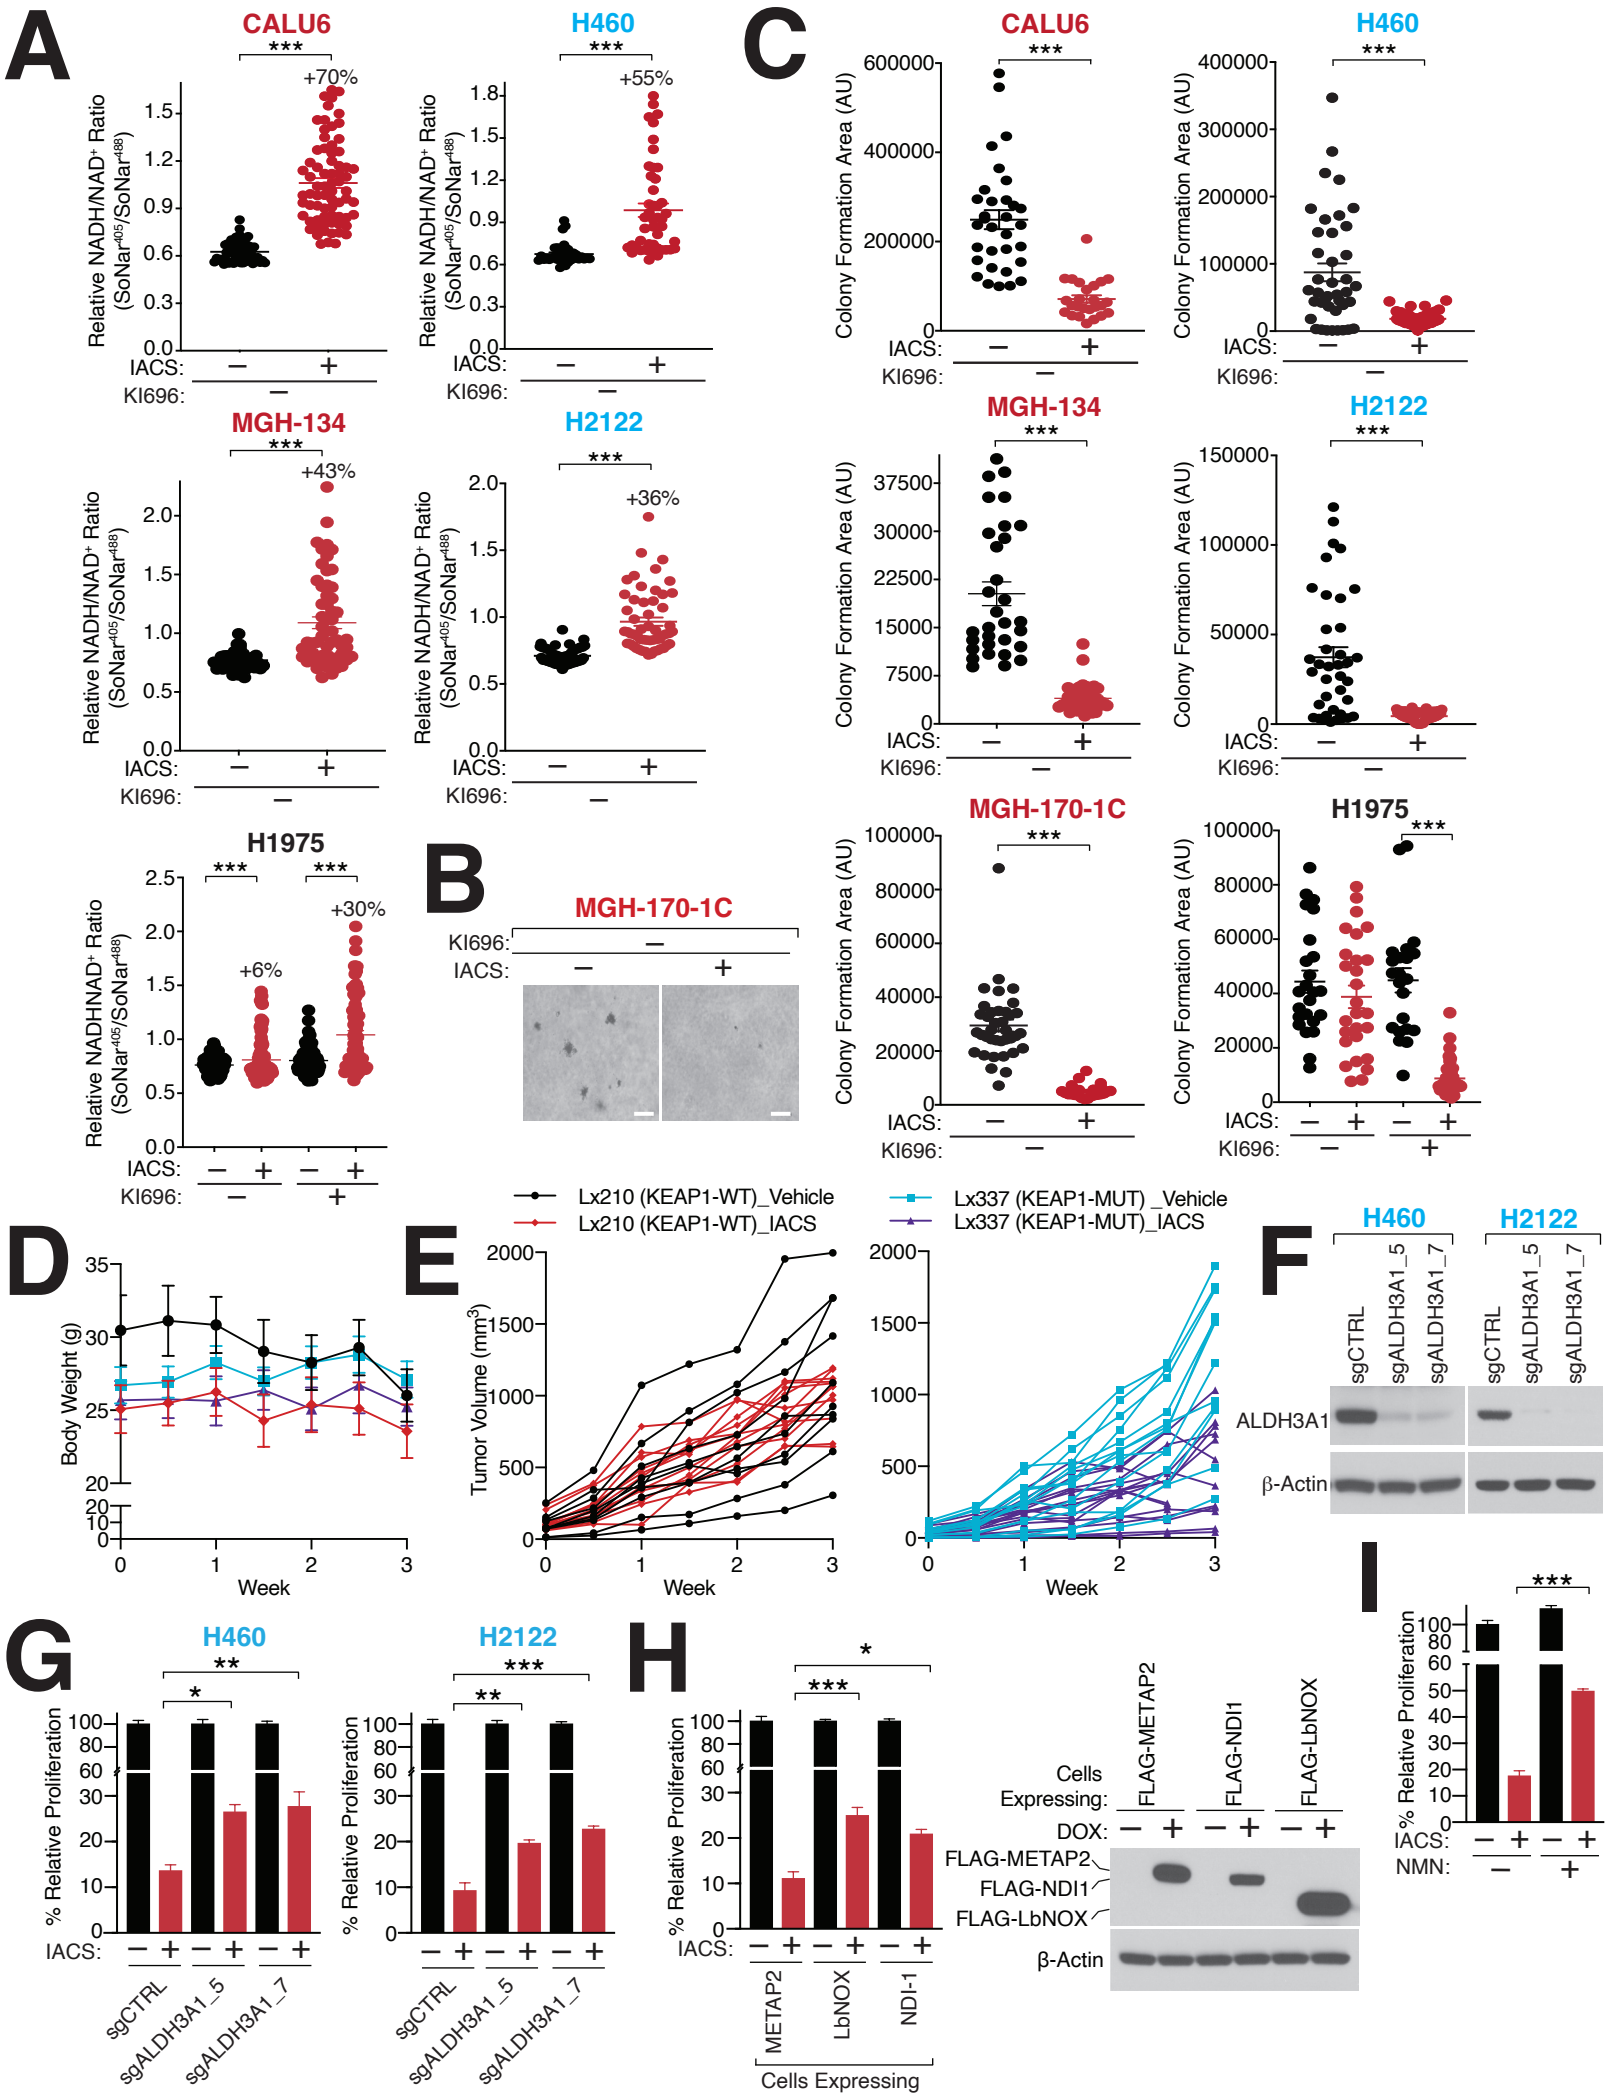

**Figure S6: Increasing the NADH/NAD<sup>+</sup> ratio selectively blocks the growth of NRF2-activated cells, Related to Figure 6.** (A) IACS-010759 (IACS) increases the NADH/NAD<sup>+</sup> ratio in KEAP1-dependent and *KEAP1*-mutant but not KEAP1-independent cells. NSCLC cell lines expressing SONAR were co-treated with IACS (100 nM) and KI696 (1 $\mu$ M) and the NADH/NAD<sup>+</sup> ratio was determined by immunofluorescence analysis comparing the emission intensity following excitation at 405 nm to 488nm (Data are represented as a mean  $\pm$  SEM, n=116 cells for CALU6, MGH-134, H460, and H2122, n=332 cells for H1975) (see also **Figure 6A**). (B) Representative images of MGH-170-1C cells grown in soft agar following treatment with IACS-017509 (200 nM). (C) Quantification of IACS treatment on NSCLC anchorage-independent growth. NSCLCs were co-treated with IACS (200 nM) and KI696 (1  $\mu$ M) and soft-agar proliferation was determined by assessing colony forming area in multiple frames using ImageJ (Data are represented as a mean  $\pm$  SEM, n= 4-6 biological replicates) (see also **Figure 6C**). (D) Body weight plot of mice harboring KEAP1-MUT or KEAP1-WT PDX during treatment duration with IACS or vehicle (see also **Figure 6D**). (E) Individual tumor volumes for KEAP1-WT (left) or KEAP1-MUT (right) PDXs treated with vehicle or IACS (see also **Figure 6D**). (F-G) Decreasing ALDH3A1 partially rescues IACS-010759 treatment in *KEAP1*-mutant cells. Immunoblot analysis of ALDH3A1 in H460 and H2122 cells expressing sgRNAs targeting ALDH3A1 (F). H460 and H2122 sgRNAs targeting ALDH3A1 and respective controls were treated with IACS or vehicle for 6 days and proliferation was determined by crystal violet staining (G). (Data are represented as a mean  $\pm$  SEM, n= 6 biological replicates). (H) Increasing NADH oxidation decreases IACS toxicity. H460 cells expressing DOX-inducible LbNOX, ND11 or METAP2 (control) were treated with DOX (100 nM) for 48 hrs and proliferation (left) was determined following 6 days of IACS treatment as described in (G). Levels of indicated proteins were determined by immunoblot (right) (Data are represented as a mean  $\pm$  SEM, n= 6 biological replicates). (I) NMN supplementation decreases IACS toxicity. H460 cells were treated with 1mM NMN for 48 hrs followed by treatment with IACS (500 nM) and proliferation was determined as described in (G) (Data are represented as a mean  $\pm$  SEM, n= 6 biological



replicates). \* indicates  $p$ -values  $< 0.05$ , \*\* indicates  $p$ -values  $< 0.01$ , \*\*\* indicates  $p$ -values  $< 0.0001$ . One-way ANOVA and Student's t-test were used to determine statistical significance.  
Scale Bar: 50  $\mu\text{m}$ .

## References

- 1 Tsherniak, A. *et al.* Defining a Cancer Dependency Map. *Cell* **170**, 564-576 e516, doi:10.1016/j.cell.2017.06.010 (2017).
- 2 Lenoir, W. F., Lim, T. L. & Hart, T. PICKLES: the database of pooled in-vitro CRISPR knockout library essentiality screens. *Nucleic Acids Res* **46**, D776-D780, doi:10.1093/nar/gkx993 (2018).
